# Supplementary material for: Reduction of AUF1-mediated follistatin mRNA decay during glucose starvation protects cells from apoptosis
Source: PubMed Central journal article supplement (PMC4176339; doi:10.1093/nar/gku778), 2014-08-26
Supplement: supp_gku778_nar-00775-a-2014-File010.pdf [file supp_gku778_nar-00775-a-2014-File010.pdf]

## Supplementary information

### Supplementary Tables

**Table S1. Primer design for generation of FST 3'UTR mutants.**

| UTR mutant                                             | Primer set                                                |
|--------------------------------------------------------|-----------------------------------------------------------|
| pGL3-UTR/1-441                                         | UTR-1-for-luc + UTR-441-rev                               |
| pGL3-UTR/1-221                                         | UTR-1-for-luc + UTR-221-rev                               |
| pGL3-UTR/222-441                                       | UTR-222-for-luc + UTR-441-rev                             |
| pGL3-UTR/ $\Delta$ 112-121=UTR/1-111<br>+ UTR/122-441  | UTR-1-for-luc + UTR-111-rev<br>UTR-121-for + UTR-441-rev  |
| pcDNA-UTR/1-441                                        | UTR-1-for-cdna + UTR-441-rev                              |
| pcDNA-UTR/1-221                                        | UTR-1-for-cdna + UTR-221-rev                              |
| pcDNA-UTR/222-441                                      | UTR-222-for-cdna + UTR-441-rev                            |
| pcDNA-UTR/ $\Delta$ 112-121=UTR/1-111<br>+ UTR/122-441 | UTR-1-for-cdna + UTR-111-rev<br>UTR-121-for + UTR-441-rev |

**Table S2. Sequence of primers used for plasmid construction.**

| Primer Name      | Sequence                   |
|------------------|----------------------------|
| UTR-1-for-luc    | GCTCTAGAACTCTCTATAAGTGTC   |
| UTR-1-for-cdna   | CCCAAGCTTACTCTCTATAAGTGTC  |
| UTR-441-rev      | GCTCTAGAGTGAGTGAATAGTAAGG  |
| UTR-221-rev      | GCTCTAGAGTAGACCTCACAATG    |
| UTR-222-for-luc  | GCTCTAGATGGATGAGGCCCATAGT  |
| UTR-222-for-cdna | CCCAAGCTTTGGATGAGGCCCATAGT |
| UTR-111-rev      | GGAATTCGCATACACTTATTTAC    |
| UTR-121-for      | GGAATTCGGGGGAAAACCTATAC    |

## Supplementary Figures

Fig. S1.

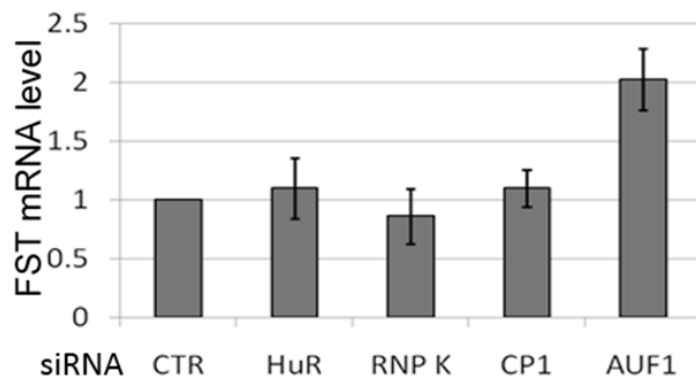

HeLa cells were transfected with control siRNA (CTR) or siRNA targeting HuR, RNP K, CP1, AUF1. The mRNA level of FST were detected.

Fig. S2

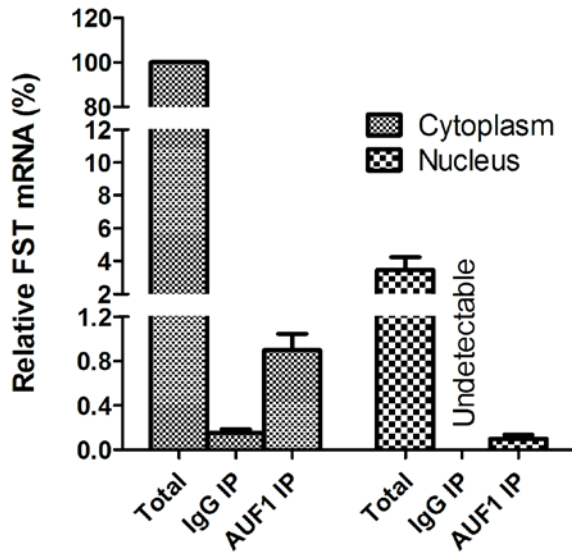

Immunoprecipitation was performed from cytoplasmic and nuclear fractions using anti-AUF1 antibody or normal immunoglobulin G (IgG). FST mRNA levels in input (10% of total fraction), IgG IP group and AUF1 IP group were detected by real-time qPCR. Total cytoplasmic FST mRNA level (10 fold of cytoplasmic input) was set to 100.

Fig. S3

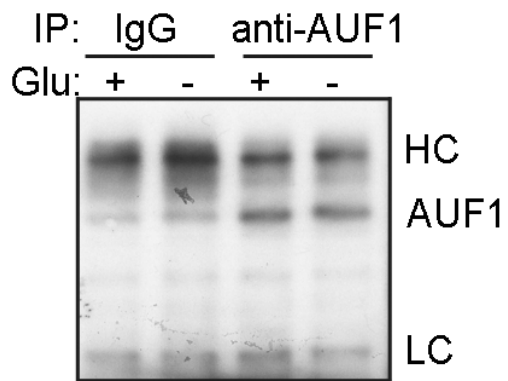

Immunoprecipitation was performed in cells cultured with or without glucose using anti-AUF1 antibody or normal immunoglobulin G (IgG), and immunoprecipitation efficiency was detected by immunoblotting.

Fig. S4

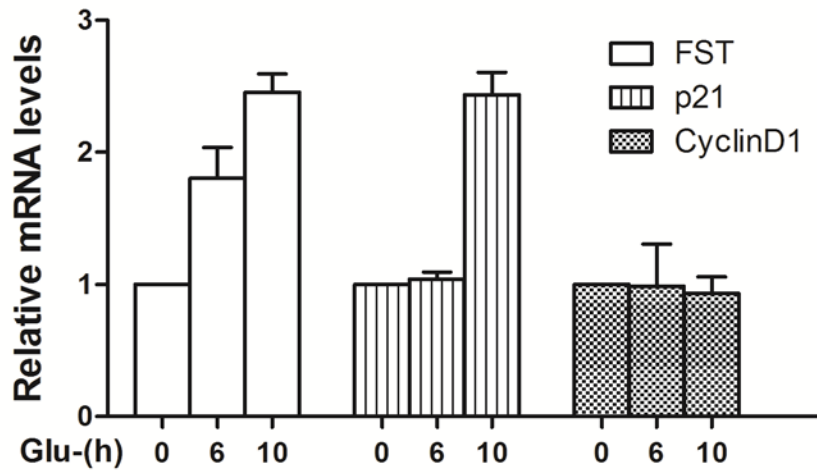

HeLa cells were incubated with or without glucose for indicated time and the mRNA levels of FST, p21 and Cyclin D1 were measured with real-time qPCR.
